# Supplementary material
Source: PubMed Central journal article supplement (PMC5266557)
Supplement: NIHMS70275-supplement-Appendix_C.pdf [file NIHMS70275-supplement-Appendix_C.pdf]

**Nettle, Andrews & Bateson: Food insecurity as a driver of obesity in humans: The insurance hypothesis**

**Online Appendix C**

**List of references used or considered for the meta-analysis**

Entries marked \* were in the initial candidate set but not included in the final dataset

- \*Abdollahi, M., Abdollahi, Z., Sheikholeslam, R., Kalantari, N., Kavehi, Z., & Neyestani, T. R. (2015). High Occurrence of Food Insecurity among Urban Afghan Refugees in Pakdasht, Iran 2008: A Cross-sectional Study. *Ecology of Food and Nutrition*, 54(3), 187–199. doi:10.1080/03670244.2013.834819
- Adams, E. J., Grummer-Strawn, L., & Chavez, G. (2003). Food Insecurity Is Associated with Increased Risk of Obesity in California. *Journal of Nutrition*, 133, 1070–1074.
- Ahn, S., Smith, M. L., Hendricks, M., & Ory, M. G. (2014). Associations of food insecurity with body mass index among baby boomers and older adults. *Food Security*, 6, 423–433. doi:10.1007/s12571-014-0344-6
- Alaimo, K., Olson, C. M., & Frongillo, E. A. (2001). Low family income and food insufficiency in relation to overweight in US children: is there a paradox? *Archives of Pediatrics & Adolescent Medicine*, 155(10), 1161–1167. doi:10.1001/archpedi.155.10.1161
- Alvarez, J., Pavao, J., Baumrind, N., & Kimerling, R. (2007). The Relationship Between Child Abuse and Adult Obesity Among California Women. *American Journal of Preventive Medicine*, 33(1), 28–33. doi:10.1016/j.amepre.2007.02.036
- \*Atalah, E., Amigo, H., & Bustos, P. (2014). Does Chile's nutritional situation constitute a double burden? *The American Journal of Clinical Nutrition*, 100(6), 1623S–7S. doi:10.3945/ajcn.114.083790
- Basiotis, P., & Lino, M. (2003). Food insufficiency and prevalence of overweight among adult women. *Family Economics and Nutrition*, 15(3), 55–57.
- Basirat, R., Abargouei, A. S., & Esmaillzadeh, A. (2012). The association between household food insecurity and childhood obesity among Iranian school-aged children in Farokhshahr. *Koomesh*, 2, 254–63.
- Bauer, K. W., Widome, R., Himes, J. H., Smyth, M., Rock, B. H., Hannan, P. J., & Story, M. (2012). High food insecurity and its correlates among families living on a rural American Indian reservation. *American Journal of Public Health*, 102(7), 1346–1352. doi:10.2105/AJPH.2011.300522
- Bawadi, H. A., Tayyem, R. F., Dwairy, A. N., & Al-Akour, N. (2012). Prevalence of food insecurity among women in northern Jordan. *Journal of Health, Population and Nutrition*, 30(1), 49–55. doi:10.3329/jhpn.v30i1.11276
- \*Beydoun, M. A., & Wang, Y. (2010). Pathways linking socioeconomic status to obesity through depression and lifestyle factors among young US adults. *Journal of Affective Disorders*, 123(1-3), 52–63. doi:10.1016/j.jad.2009.09.021
- \*Bhargava, A., Jolliffe, D., & Howard, L. L. (2008). Socio-economic, behavioural and environmental factors predicted body weights and household food insecurity scores in the Early Childhood Longitudinal Study-Kindergarten. *British Journal of Nutrition*, 100(02), 438–444. doi:10.1017/S0007114508894366
- \*Bhattacharya, J., Currie, J., & Haider, S. (2004). Poverty, food insecurity, and nutritional outcomes in children and adults. *Journal of Health Economics*, 23(4), 839–862. doi:10.1016/j.jhealeco.2003.12.008
- Black, M., Quigg, A., Cook, J., Casey, P., Cutts, D., Chilton, M., ... Frank, D. (2012). WIC participation and attenuation of stress-related child health risks of household food insecurity and caregiver depressive symptoms. *Archives of Pediatrics & Adolescent Medicine*, 166(5), 444–451. Retrieved from <http://ovidsp.ovid.com/ovidweb.cgi?T=JS&CSC=Y&NEWS=N&PAGE=fulltext&D=medl&AN=22566545>
- \*Blankson, B., & Hall, A. (2012). The anthropometric status of elderly women in rural Ghana and factors associated with low body mass index. *The Journal of Nutrition, Health & Aging*, 16(7), 15–20. doi:10.1007/s12603-012-0065-5
- Blue Bird Jernigan, V. ., Garrouette, E., Krantz, E. M., & Buchwald, D. (2013). Food insecurity and obesity among American Indians and Alaska Natives and Whites in California. *Journal of Hunger & Environmental Nutrition*, 8, 458–471. doi:http://dx.doi.org/10.1080/19320248.2013.816987
- \*Borre, K., Ertle, L., & Graff, M. (2010). Working to eat: Vulnerability, food insecurity, and obesity among migrant and seasonal farmworker families. *American Journal of Industrial Medicine*, 53, 443–462. doi:10.1002/ajim.20836

- Bouzitou, G. D. N., Fayomi, B., & Delisle, H. (2005). Malnutrition infantile et surpoids maternel dans des ménages urbains pauvres au Bénin. *Cahiers Santé, 15*, 263–270.
- Brewer, D. P., Catlett, C. S., Porter, K. N., Lee, J. S., Hausman, D. B., Reddy, S., & Johnson, M. A. (2010). Physical limitations contribute to food insecurity and the food insecurity-obesity paradox in older adults at senior centers in Georgia. *Journal of Nutrition for the Elderly, 29*(2), 150–69. doi:10.1080/01639361003772343
- \*Bronte-Tinkew, J., Zaslow, M., Capps, R., Horowitz, A., & McNamara, M. (2007). Food insecurity works through depression, parenting, and infant feeding to influence overweight and health in toddlers. *The Journal of Nutrition, 137*(9), 2160–2165.
- Bruening, M., MacLehose, R., Loth, K., Story, M., & Neumark-Sztainer, D. (2012). Feeding a family in a recession: Food insecurity among Minnesota parents. *American Journal of Public Health, 102*(3), 520–526. doi:10.2105/AJPH.2011.300390
- Buscemi, J., Beech, B. M., & Relyea, G. (2011). Predictors of Obesity in Latino Children: Acculturation as a Moderator of the Relationship Between Food Insecurity and Body Mass Index Percentile. *Journal of Immigrant and Minority Health, 13*(1), 149–154. doi:10.1007/s10903-009-9263-6
- Casey, P. H., Simpson, P. M., Gossett, J. M., Bogle, M. L., Champagne, C. M., Connell, C., ... Weber, J. (2006). The Association of Child and Household Food Insecurity with Childhood Overweight Status. *Pediatrics, 118*, e1406. doi:10.1542/peds.2006-0097
- Casey, P., Szeto, K., Lensing, S., Bogle, M., & Weber, J. (2001). Children in Food-Insufficient, Low-Income Families. *Archives of Pediatrics and Adolescent Medicine, 155*, 508–514.
- Chaput, J. P., Gilbert, J. A., & Tremblay, A. (2007). Relationship between Food Insecurity and Body Composition in Ugandans Living in Urban Kampala. *Journal of the American Dietetic Association, 107*, 1978–1982. doi:10.1016/j.jada.2007.08.005
- Che, J., & Chen, J. (2001). Food insecurity in Canadian households. *Health Reports / Statistics Canada, Canadian Centre for Health Information = Rapports Sur La Sante / Statistique Canada, Centre Canadien D'information Sur La Sante, 12*(4), 11–22. doi:10.1162/003465302317411587
- Cheng, S., Kamano, J., Kirui, N. K., Manuthu, E., Buckwalter, V., Ouma, K., & Pastakia, S. D. (2013). Prevalence of food insecurity in patients with diabetes in western Kenya. *Diabetic Medicine, 30*(6), 215–222. doi:10.1111/dme.12174
- Christian, T. J. (5AD). Grocery store access and the food insecurity-obesity paradox. *Journal of Hunger and Environmental Nutrition, 360-9*.
- Cooke, M. J., Wilk, P., Paul, K. W., & Gonneville, S. L. H. (2013). Predictors of obesity among Métis children: Socio-economic, behavioural and cultural factors. *Canadian Journal of Public Health, 104*(4), e298–e303.
- Cordeiro, M. D. M., Monego, E. T., & Martins, K. A. (2014). Overweight in Goiás' quilombola students and food insecurity in their families. *Revista de Nutrição, 27*(4), 405–412.
- Crews, D. C., & et al. (2015). Effect of food insecurity on chronic kidney disease in lower income Americans. *American Journal of Nephrology, 39*(1), 27–35. doi:10.1159/000357595.Effect
- Cuevas-Nasu, L., Rivera-Dommarco, J. A., & Shamah-Levy, T. (2014). Inseguridad alimentaria y estado de nutriciion en menores de cinco anos de edad en Mexico. *Salud Publica Mexicana, 56*(2), 47–53.
- \*da Silva, V. S., Souza, I., Silva, D. A. S., Petroski, E. L., & da Fonseca, M. de J. M. (2015). Correspondence between overweight and socioeconomic and demographic indicators in the adult Brazilian population. *Revista Brasileira de Epidemiologia, 18*(2), 476–489. doi:10.1590/1980-5497201500020015
- \*Dammann, K. W., & Smith, C. (2011). Food-related environmental, behavioral, and personal factors associated with body mass index among urban, low-income African-American, American Indian, and Caucasian women. *American Journal of Health Promotion : AJHP, 25*(6), e1–e10. doi:10.4278/ajhp.091222-QUAN-397
- \*de Souza, M. M., Pedraza, D. F., & de Menezes, T. N. (2012). Estado nutricional de crianças assistidas em creches e situação de (in) segurança alimentar de suas famílias. *Ciencia & Saúde Coletiva, 17*(12), 3425–3436. doi:10.1590/S1413-81232012001200027
- \*Dev, D. A., McBride, B. A., Fiese, B. H., Jones, B. L., & Cho, H. (2013). Risk factors for overweight/obesity in preschool children: an ecological approach. *Childhood Obesity, 9*(5), 399–408. doi:10.1089/chi.2012.0150
- Dharod, J. M., Croom, J. E., & Sady, C. G. (2013). Food insecurity: its relationship to dietary intake and body weight among Somali refugee women in the United States. *Journal of Nutrition Education and Behavior, 45*(1), 47–53. doi:10.1016/j.jneb.2012.03.006
- \*Di Cesare, M., Bhatti, Z., Soofi, S. B., Fortunato, L., Ezzati, M., & Bhutta, Z. a. (2015). Geographical and socioeconomic inequalities in women and children's nutritional status in Pakistan in 2011: an analysis of data from a nationally representative survey. *The Lancet Global Health, 3*, e229–e239. doi:10.1016/S2214-109X(15)70001-X

- \*dos Santos, J. V, Gigante, D. P., & Domingues, M. R. (2010). Prevalência de insegurança alimentar em Pelotas , Rio Grande do Sul , Brasil , e estado nutricional de indivíduos que vivem nessa condição Prevalence of food insecurity in Pelotas , Rio Grande do Sul State , Brazil , and associated nutritional status. *Cadernos de Saude Publica*, 26(1), 41–49. doi:10.1590/S0102-311X2010000100005
- \*Dressler, H., & Smith, C. (2013). Environmental, personal, and behavioral factors are related to body mass index in a group of multi-ethnic, low-income women. *Journal of the Academy of Nutrition and Dietetics*, 113(12), 1662–8. doi:10.1016/j.jand.2013.07.009
- Dubois, L., Francis, D., Burnier, D., Tatone-Tokuda, F., Girard, M., Gordon-Strachan, G., ... Wilks, R. (2011). Household food insecurity and childhood overweight in Jamaica and Québec: a gender-based analysis. *BMC Public Health*, 11(1), 199. doi:10.1186/1471-2458-11-199
- Emery, C. F., Olson, K. L., Lee, V. S., Habash, D. L., Nasar, J. L., & Bodine, A. (2015). Home environment and psychosocial predictors of obesity status among community-residing men and women. *International Journal of Obesity*, 39(9), 1401–1407. doi:10.1038/ijo.2015.70
- Feinberg, E., Kavanagh, P. L., Young, R. L., Prudent, N., Urban, A., & Families, B. (2008). Food Insecurity and Compensatory Feeding Practices. *Pediatrics*, 122, e854. doi:10.1542/peds.2008-0831
- \*Fitzgerald, N., Hromi-Fiedler, A., Segura, Perez, S., & Perez-Escamilla, R. (2011). Food insecurity is related in increased risk of type 2 diabetes among Latinas. *Ethnicity and Disease*, 3, 328–34.
- Flórez, K. R., Dubowitz, T., Ghosh-Dastidar, M. (Bonnie), Beckman, R., & Collins, R. L. (2015). Associations between Depressive Symptomatology, Diet, and Body Mass Index among Participants in the Supplemental Nutrition Assistance Program. *Journal of the Academy of Nutrition and Dietetics*, 115(7), 1102–1108. doi:10.1016/j.jand.2015.01.001
- Fonseca, Z. Y., Gonzalo, A. P. D., & Herran, O. F. (2013). Malnutricion y seguridad alimentaria: un estudio multinivel. *Revista Chilena de Nutricion*, 3, 206–215.
- Ford, E. S. (2013). Food security and cardiovascular disease risk among adults in the United States: findings from the National Health and Nutrition Examination Survey, 2003-2008. *Preventing Chronic Disease*, 10(11), E202. doi:10.5888/pcd10.130244
- \*Frank, D. A., Neault, N. B., Skalicky, A., Cook, J. T., Wilson, J. D., Levenson, S., ... Berkowitz, C. (2006). Heat or eat: the Low Income Home Energy Assistance Program and nutritional and health risks among children less than 3 years of age. *Pediatrics*, 118(5), e1293–302. doi:10.1542/peds.2005-2943
- Galiano, L. P., Abril, F. M., Ernert, A., & Bau, A. M. (2012). The double burden of malnutrition and its risk factors in school children in Tunja. *Archivos Latinoamericanos de Nutricion*, 62(2), 119–126.
- \*Gooding, H. C., Walls, C. E., & Richmond, T. K. (2012). Food Insecurity and Increased BMI in Young Adult Women. *Obesity*, 20(9), 1896–1901. doi:10.1038/oby.2011.233
- Gulliford, M. C. (2003). Food insecurity, food choices, and body mass index in adults: nutrition transition in Trinidad and Tobago. *International Journal of Epidemiology*, 32(4), 508–516. doi:10.1093/ije/dyg100
- Gulliford, M. C., Nunes, C., & Rocke, B. (2006). Food insecurity, weight control practices and body mass index in adolescents. *Public Health Nutrition*, 9(5), 570–574. doi:10.1079/PHN2005886
- Gundersen, C., Garasky, S., & Lohman, B. J. (2009). Food Insecurity Is Not Associated with Childhood Obesity as Assessed Using Multiple Measures of Obesity. *The Journal of Nutrition*, 139, 1173–1178. doi:10.3945/jn.109.105361.health
- \*Gundersen, C., Lohman, B. J., Eisenmann, J. C., Garasky, S., & Stewart, S. D. (2008). Child-specific food insecurity and overweight are not associated in a sample of 10- to 15-year-old low-income youth. *The Journal of Nutrition*, 138(2), 371–378. doi:138/2/371 [pii]
- \*Gundersen, C., Lohman, B. J., Garasky, S., Stewart, S., & Eisenmann, J. (2008). Food Security, Maternal Stressors, and Overweight Among Low-Income US Children: Results From the National Health and Nutrition Examination Survey (1999-2002). *Pediatrics*, 122(3), e529–e540. doi:10.1542/peds.2008-0556
- \*Haldeman, L., Gruber, K., & Ingram, K. (2008). Determinants of food security and diet among rural and urban Latino/Hispanic immigrants. *Journal of Hunger and Environmental Nutrition*, 2, 67–84.
- \*Hannum, E., Liu, J., & Frongillo, E. a. (2014). Poverty, food insecurity and nutritional deprivation in rural China: Implications for children's literacy achievement. *International Journal of Educational Development*, 34, 90–97. doi:10.1016/j.ijedudev.2012.07.003
- \*Hanson, K. L., Sobal, J., & Frongillo, E. a. (2007). Gender and marital status clarify associations between food insecurity and body weight. *The Journal of Nutrition*, 137(6), 1460–1465.
- Harrison, K., Peralta, M., & Team, S. K. (2015). Parent and Child Media Exposure , Preschooler Dietary Intake , and Preschooler Healthy-Meal Schemas in the Context of. *Journal of Communication*, 65, 443–464. doi:10.1111/jcom.12153

- \*Herrera-Cuenca, M., & et al. (2013). Obesidad en escolares venezolanos y factores de riesgo para el desarrollo de diabetes tipo 2. *Anales Venezolanos de Nutrición*, 26, 95–105.
- Holben, D. H., & Pheley, A. M. (2006). Diabetes Risk and Obesity in Food-Insecure Households in Rural Appalachian Ohio. *Preventing Chronic Disease*, 3(3), 1–9.
- Homenko, D. R., Morin, P. C., Eimicke, J. P., Teresi, J. A., & Weinstock, R. S. (2010). Food Insecurity and Food Choices in Rural Older Adults with Diabetes Receiving Nutrition Education via Telemedicine. *Journal of Nutrition Education and Behavior*, 42(6), 404–409. doi:10.1016/j.jneb.2009.08.001
- Ihab, A. N., Rohana, A. J., Manan, W. M. W., Suriati, W. N. W., Zalilah, M. S., & Rusli, A. M. (2013). Nutritional Outcomes Related to Household Food Insecurity among Mothers in Rural Malaysia. *Journal of Health, Population and Nutrition*, 31(4), 480–489.
- Isanaka, S., Mora-plazas, M., Lopez-arana, S., Baylin, A., & Villamor, E. (2007). Food Insecurity Is Highly Prevalent and Predicts Underweight but Not Overweight in Adults and School Children from Bogota. *Journal of Nutrition*, 137, 2747–55.
- Jilcott, S. B., Burke, S. C., & Moore, J. B. (2011). Associations between Food Insecurity, Supplemental Nutrition Assistance Program (SNAP) Benefits, and Body Mass Index among Adult Females. *Journal of the American Dietetic Association*, 111(11), 1741–1745. doi:10.1016/j.jada.2011.08.004
- \*Jimenez Cruz, A., & Bacardi-Gascon, M. (2007). Prevalence of overweight and hunger among Mexican children from migrant parents. *Nutricion Hospitalaria*, 22, 85–88.
- \*Jimenez-Cruz, A., Bacardi-Gascon, M., & Spindler, A. (2003). Obesity and hunger among Mexican-Indian migrant children on the US – Mexico border. *International Journal of Obesity*, 27, 740–747. doi:10.1038/sj.ijo.0802286
- \*Jimenez-Cruz, A., & et al. (2011). Maternal BMI and migration status as predictors of childhood obesity in Mexico. *Nutricion Hospitalaria*, 26, 187–193. doi:10.3305/nh.2011.26.1.4592
- Jones, S. J., & Frongillo, E. A. (2006). Food Assistance and the Well-Being of Low-Income Families The Modifying Effects of Food Stamp Program Participation on the Relation between Food Insecurity and Weight Change in Women 1 , 2. *Journal of Nutrition*, 136, 1091–1094.
- Jones, S. J., & Frongillo, E. A. (2007). Food insecurity and subsequent weight gain in women. *Public Health Nutrition*, 10(2), 145–151. doi:10.1017/S1368980007246737
- Jones, S. J., Jahns, L., Laraia, B. A., & Haughton, B. (2003). Lower Risk of Overweight in School-aged Food Insecure Girls Who Participate in Food Assistance. *Archives of Pediatrics and Adolescent Medicine*, 157, 780–784.
- \*Jyoti, D. F., Frongillo, E. A., Jones, S. J., & Al, J. E. T. (2005). Community and International Nutrition Food Insecurity Affects School Children ' s Academic Performance , Weight Gain , and Social Skills 1 – 3. *Journal of Nutrition*, 135, 2831–2839.
- Kac, G., & et al. (2012). Severe food insecurity is associated with obesity among Brazilian adolescent females. *Public Health Nutrition*, 15(10), 1854–1860. doi:10.1017/S1368980011003582
- Kac, G., Schlüssel, M. M., Pérez-Escamilla, R., Velásquez-Melendez, G., & da Silva, A. A. M. (2012). Household food insecurity is not associated with BMI for age or weight for height among Brazilian children aged 0-60 months. *PLoS ONE*, 7(9), e45747. doi:10.1371/journal.pone.0045747
- Kaiser, L. L., & et al. (2002). Food insecurity and nutritional outcomes of preschool-age Mexican-American children. *Journal of the American Dietetic Association*, 102, 924–9.
- Kaiser, L. L., Townsend, M. S., Melgar-Quiñonez, H. R., Fujii, M. L., & Crawford, P. B. (2004). Choice of instrument influences relations between food insecurity and obesity in Latino women. *The American Journal of Clinical Nutrition*, 80(5), 1372–1378.
- Kamal, S. M. M., Hassan, C. H., & Alam, G. M. (2015). Dual Burden of Underweight and Overweight among Women in Bangladesh : Patterns , Prevalence , and Sociodemographic Correlates. *Journal of Health, Population and Nutrition*, 33(1), 92–105.
- \*Karnik, A., Foster, B. A., & Mayer, V. (2011). Food insecurity and obesity in New York. *Medical Care*, 49, 658–61.
- Kaur, J., Lamb, M. M., & Ogden, C. L. (2015). The Association between Food Insecurity and Obesity in Children-The National Health and Nutrition Examination Survey. *Journal of the Academy of Nutrition and Dietetics*, 115(5), 751–758. doi:10.1016/j.jand.2015.01.003
- Khan, S., Pinckney, R. G., Keeney, D., Frankowski, B., & Carney, J. K. (2011). Prevalence of Food Insecurity and Utilization of Food Assistance Program : An Exploratory Survey of a Vermont Middle School. *Journal of School Health*, 81(1), 15–20.
- Kilanowski, J. F. (2012). Patterns and Correlates of Nutrition Among Migrant Farm- Worker Children. *Western Journal of Nursing Research*, 34, 396–416. doi:10.1177/0193945910381597

- \*Kim, K., & Frongillo, E. A. (2007). Participation in Food Assistance Programs Modifies the Relation of Food Insecurity with Weight and Depression in Elders. *Journal of Nutrition*, *137*, 1005–1010.
- Kimani-Murage, E. W. (2013). Exploring the paradox: double burden of malnutrition in rural South Africa. *Global Health Action*, *6*(1), 19249. doi:10.3402/gha.v6i0.19249
- \*Kohn, N. J., Bell, J. F., Grow, H. M. G., & Chan, G. (2012). Food insecurity, food assistance and weight status in US youth: new evidence from NHANES 2007-8. *Pediatric Obesity*, *9*, 155–166. doi:10.1111/j.2047-6310.2012.00143.x
- \*Kuku, O., Garasky, S., & Gundersen, C. (2012). The relationship between childhood obesity and food insecurity : a nonparametric analysis. *Applied Economics*, *44*, 2667–2677. doi:10.1080/00036846.2011.566192
- Laraia, B. A., Siega-Riz, A. M., & Evenson, K. R. (2004). Self-reported overweight and obesity are not associated with concern about enough food among adults in New York and Louisiana. *Preventive Medicine*, *38*(2), 175–181. doi:10.1016/j.ypmed.2003.09.033
- Laraia, B. A., Siega-Riz, A. M., & Gundersen, C. (2010). Household food insecurity is associated with self-reported pregravid weight stats, gestational weight gain, and pregnancy complications. *Journal of the American Dietetic Association*, *110*(5), 692–701. doi:10.1016/j.jada.2010.02.014
- Laraia, B., Epel, E., & Siega-riz, A. M. (2013). Food insecurity with past experience of restrained eating is a recipe for increased gestational weight gain. *Appetite*, *65*, 178–184. doi:10.1016/j.appet.2013.01.018
- Laraia, B., Vinikoor-Imler, L. C., & Siega-Riz, A. M. (2015). Food insecurity during pregnancy leads to stress, disordered eating, and greater postpartum weight among overweight women. *Obesity*, *00*(00), n/a–n/a. doi:10.1002/oby.21075
- \*Leung, C. W., Epel, E. S., Ritchie, L. D., Crawford, P. B., & Laraia, B. A. (2014). Food insecurity is inversely associated with diet quality of lower-income adults. *Journal of the Academy of Nutrition and Dietetics*, *114*(12), 1943–53.e2. doi:10.1016/j.jand.2014.06.353
- Leung, C. W., & Villamor, E. (2011). Is participation in food and income assistance programmes associated with obesity in California adults? Results from a state-wide survey. *Public Health Nutrition*, *14*(4), 645–652. doi:10.1017/S1368980010002090
- Leung, C. W., Williams, D. R., & Villamor, E. (2012). Very low food security predicts obesity predominantly in California Hispanic men and women. *Public Health Nutrition*, *15*(12), 2228–2236. doi:10.1017/S1368980012000857
- Lohman, B. J., Ph, D., Stewart, S., Ph, D., Gundersen, C., Ph, D., ... Ph, D. (2009). Adolescent Overweight and Obesity : Links to Food Insecurity and Individual , Maternal , and Family Stressors. *Journal of Adolescent Health*, *45*(3), 230–237. doi:10.1016/j.jadohealth.2009.01.003
- Lopes, T. S., Sichieri, R., Salles-Costa, R., Veiga, G. V., & Pereira, R. a. (2013). Family food insecurity and nutritional risk in adolescents from a low-income area of Rio de Janeiro, Brazil. *Journal of Biosocial Science*, *45*(5), 661–74. doi:10.1017/S0021932012000685
- Lyons, A., Park, M. P. H. J., & Nelson, C. H. (2008). Food Insecurity and Obesity : A Comparison of Self-Reported and Measured Height and Weight. *American Journal of Preventive Medicine*, *98*(4), 751–758. doi:10.2105/AJPH.2006.0932n
- Markwick, A., Ansari, Z., Sullivan, M., & McNeil, J. (2014). Social determinants and lifestyle risk factors only partially explain the higher prevalence of food insecurity among Aboriginal and Torres Strait Islanders in the Australian state of Victoria: a cross-sectional study. *BMC Public Health*, *14*(1), 598. doi:10.1186/1471-2458-14-598
- Martin, K. S., & Ferris, A. M. (2007). Food Insecurity and Gender are Risk Factors for Obesity. *Journal of Nutrition Education and Behavior*, *39*(1), 31–36. doi:10.1016/j.jneb.2006.08.021
- Martin, M. A., & Lippert, A. M. (2012). Social Science & Medicine Feeding her children , but risking her health : The intersection of gender , household food insecurity and obesity. *Social Science & Medicine*, *74*(11), 1754–1764. doi:10.1016/j.socscimed.2011.11.013
- Martin-Fernandez, J., Caillavet, F., Lhuissier, A., & Chauvin, P. (2014). Food insecurity, a determinant of obesity? - An analysis from a population-based survey in the paris metropolitan area, 2010. *Obesity Facts*, *7*(2), 120–129. doi:10.1159/000362343
- \*Martins, D. C., Gorman, K. S., Miller, R. J., Murphy, L., Sor, S., Martins, J. C., & Vecchiarelli, M. L. (2015). Assessment of Food Intake, Obesity, and Health Risk among the Homeless in Rhode Island. *Public Health Nursing*, 1–9. doi:10.1111/phn.12180
- Matheson, D. M., Varady, J., Varady, A., & Killen, J. D. (2002). Household food security and nutritional status of Hispanic children in the fifth grade. *The American Journal of Clinical Nutrition*, *76*(1), 210–217.

- Mccurdy, K., Kisler, T., Gorman, K. S., & Metallinos-katsaras, E. (2015). Food- and Health-Related Correlates of Self-Reported Body Mass Index Among Low-Income Mothers of Young Children. *Journal of Nutrition Education and Behavior*, 47(3), 225–233.e1. doi:10.1016/j.jneb.2015.01.004
- \*Mercille, G., Receveur, O., & Potvin, L. (2012). Household Food Insecurity and Canadian Aboriginal Women's Self-efficacy in Food Preparation. *Canadian Journal of Dietetic Practice and Research*, 73(3), 134–140. doi:10.3148/73.3.2012.134
- Metallinos-Katsaras, E., Must, A., & Gorman, K. (2012). A Longitudinal Study of Food Insecurity on Obesity in Preschool Children. *Journal of the Academy of Nutrition and Dietetics*, 112(12), 1949–1958. doi:10.1016/j.jand.2012.08.031
- Metallinos-Katsaras, E., Sherry, B., & Kallio, J. (2009). Food Insecurity Is Associated with Overweight in Children Younger than 5 Years of Age. *Journal of the American Dietetic Association*, 109(10), 1790–1794. doi:10.1016/j.jada.2009.07.007
- Miller, E., Wieneke, K. M., Murphy, J. M., Desmond, S., Schiff, A., Canenguez, K. M., & Kleinman, R. E. (2008). Child and parental poor health among families at risk for hunger attending a community health center. *Journal of Health Care for the Poor and Underserved*, 19(2), 550–561. doi:10.1353/hpu.0.0008
- \*Millimet, D. L., & Roy, M. (2015). Partial Identification of the Long-Run Causal Effect of Food Security on Child Health. *Empirical Economics*, 48, 83–141. doi:10.1007/s00181-014-0867-x
- Mohamadpour, M., Sharif, Z. M., & Keysami, M. A. (2012). Food insecurity, health and nutritional status among sample of palm-plantation households in Malaysia. *Journal of Health, Population, and Nutrition*, 30(3), 291–302. doi:10.3329/jhpn.v30i3.12292
- Mohammadi, F., Omidvar, N., Harrison, G. G., Ghazi-Tabatabaei, M., Abdollahi, M., Houshiar-Rad, A., ... Dorosty, A. R. (2013). Is household food insecurity associated with overweight/obesity in women? *Iranian Journal of Public Health*, 42(4), 380–390.
- Monteiro, F., Schmidt, S. T., Costa, I. B. Da, Almeida, C. C. B., & Matuda, N. D. S. (2014). Bolsa Família: insegurança alimentar e nutricional de crianças menores de cinco anos. *Ciência & Saúde Coletiva*, 19(5), 1347–1358. doi:10.1590/1413-81232014195.21462013
- Morales-ruán, M. C., C, M., Humarán, I. M., C, M., Shamah-levy, T., Sp, D., ... C, D. (2014). La inseguridad alimentaria está asociada con obesidad en mujeres adultas de México. *Revista Salud Publica de Mexico*, 56(1), 54–61.
- Morrissey, T. W., Jacknowitz, A., & Vinopal, K. (2014). Local food prices and their associations with children's weight and food security. *Pediatrics*, 133(3), 422–30. doi:10.1542/peds.2013-1963
- Nguyen, B. T., Shuval, K., Bertmann, F., & Yaroch, A. L. (2015). The Supplemental Nutrition Assistance Program, food insecurity, dietary quality, and obesity among US adults. *American Journal of Public Health*, 105, 1453–9.
- Oh, S., & Hong, M. J. (2003). Food insecurity is associated with dietary intake and body size of Korean children from low-income families in urban areas. *European Journal of Clinical Nutrition*, 57(12), 1598–1604. doi:10.1038/sj.ejcn.1601877
- Oliveira, J. S., de Lira, P. I. C., Veras, I. C. L., Maia, S. R., de Lemos, M. C. C., de Andrade, S. L. L. S., ... Batista Filho, M. (2009). Estado nutricional e insegurança alimentar de adolescentes e adultos em duas localidades de baixo índice de desenvolvimento humano. *Revista de Nutricao*, 22(4), 453–465. doi:10.1590/S1415-52732009000400002
- \*Oliveira, J. S., Lira, P. I. C., Andrade, S. L. L. S., Maia, S. R., Sousa, L., Sales, A. C., & Filho, M. B. (2009). Insegurança Alimentar e estado nutricional de crianças de São João do Tigre, no semi-árido do Nordeste. *Revista Brasileira de Epidemiologia*, 12(3), 413–423. doi:10.1590/S1415-790X2009000300010
- \*Oliveira, J. S., Lira, P. I. C., Maia, S. R., Sequeira, L. A. D. S., Amorim, R. C. D. A., & Batista Filho, M. (2010). Insegurança alimentar e estado nutricional de crianças de Gameleira, zona da mata do Nordeste brasileiro. *Revista Brasileira de Saúde Materno Infantil*, 10(2), 237–245. doi:10.1590/S1519-38292010000200011
- Olson, C. M. (1999). Symposium: Advances in Measuring Food Insecurity and Hunger in the U.S. Introduction. *The Journal of Nutrition*, 129(2S Suppl), 504S–505S. doi:0022-3166/99
- Olson, C. M., Bove, C. F., & Miller, E. O. (2007). Growing up poor: Long-term implications for eating patterns and body weight. *Appetite*, 49(1), 198–207. doi:10.1016/j.appet.2007.01.012
- Olson, C. M., & Strawderman, M. S. (2008). The relationship between food insecurity and obesity in rural childbearing women. *Journal of Rural Health*, 24(1), 60–66. doi:10.1111/j.1748-0361.2008.00138.x
- Ortiz-Hernández, L., Acosta-Gutiérrez, M. N., Núñez-Pérez, A. E., Peralta-Fonseca, N., & Ruiz-Gómez, Y. (2007). En escolares de la Ciudad de México la inseguridad alimentaria se asoció positivamente con el sobrepeso. *Revista de Investigacion Clinica*, 59(1), 32–41.

- Ortiz-Hernández, L., Rodríguez-Magallanes, M., & Melgar-Quiñónez, H. (2012). Obesidad, conducta alimentaria e inseguridad alimentaria en adolescentes de la Ciudad de México. *Boletín Médico Del Hospital Infantil de Mexico*, 69(6), 431–441.
- Palar K Linnemayr S, Smith A, Farias H, Wagner G, Martinez H, D. K. P. (2015). Impact of food support on food security and body weight among HIV antiretroviral therapy recipients in Honduras: A pilot intervention trial. *AIDS Care - Psychological and Socio-Medical Aspects of AIDS/HIV*, 27, 409. doi:10.1080/09540121.2014.983041
- Pan, L., Sherry, B., Njai, R., & Blanck, H. M. (2012). Food Insecurity Is Associated with Obesity among US Adults in 12 States. *Journal of the Academy of Nutrition and Dietetics*, 112(9), 1403–1409. doi:10.1016/j.jand.2012.06.011
- Pardilla, M., Prasad, D., Suratkar, S., & Gittelsohn, J. (2014). High levels of household food insecurity on the Navajo Nation. *Public Health Nutrition*, 17(1), 58–65. doi:10.1017/S1368980012005630
- Parker, E. D., Widome, R., Nettleton, J. A., & Pereira, M. A. (2010). Food Security and Metabolic Syndrome in U.S. Adults and Adolescents: Findings From the National Health and Nutrition Examination Survey, 1999–2006. *Annals of Epidemiology*, 20(5), 364–370. doi:10.1016/j.annepidem.2010.02.009
- Pedraza, D. F., Queiroz, D. De, Paiva, A. D. A., Cunha, M. A. L. Da, & Lima, Z. N. (2014). Seguridad alimentaria, crecimiento y niveles de vitamina A, hemoglobina y zinc en niños preescolares del nordeste de Brasil. *Ciência & Saúde Coletiva*, 19(2), 641–650. doi:10.1590/1413-81232014192.22612012
- \*Pimentel, P. G., Sichieri, R., & Salles-costa, R. (2009). Insegurança alimentar, condições socioeconômicas e indicadores antropométricos em crianças da Região Metropolitana do Rio de Janeiro/Brasil. *Revista Brasileira de Estudos de População*, 26, 283–294.
- Pirkle, C. M., Lucas, M., Dallaire, R., Ayotte, P., Jacobson, J. L., Jacobson, S. W., ... Muckle, G. (2014). Food insecurity and nutritional biomarkers in relation to stature in Inuit children from Nunavik. *Can J Public Health*, 105(4), e233–8. Retrieved from <http://www.ncbi.nlm.nih.gov/pubmed/25166123>
- Porter, K. N., & Johnson, M. A. (2011). Obesity is more strongly associated with inappropriate eating behaviors than with mental health in older adults receiving congregate meals. *Journal of Nutrition in Gerontology and Geriatrics*, 30(4), 403–15. doi:10.1080/21551197.2011.623960
- Rahman, A., & Karim, R. (2013). Prevalence of food insecurity among women in rural area of North West Bangladesh. *Pakistan Journal of Nutrition*, 12, 329–33.
- \*Richards, R., & Smith, C. (2010). Investigation of the hunger-obesity paradigm among shelter-based homeless women living in Minnesota. *Journal of Hunger and Environmental Nutrition*, 5(917401126), 339–359. doi:10.1080/19320248.2010.504100
- Robaina, K. A., & Martin, K. S. (2013). Food Insecurity, Poor Diet Quality, and Obesity among Food Pantry Participants in Hartford, CT. *Journal of Nutrition Education and Behavior*, 45(2), 159–164. doi:10.1016/j.jneb.2012.07.001
- Rosas, L. G., Guendelman, S., Harley, K., Fernald, L. C. H., Neufeld, L., Mejia, F., & Eskenazi, B. (2011). Factors associated with overweight and obesity among children of Mexican descent: results of a binational study. *Journal of Immigrant and Minority Health*, 13(1), 169–80. doi:10.1007/s10903-010-9332-x
- Rose, D., & Bodor, J. N. (2006). Household Food Insecurity and Overweight Status in Young School Children: Results From the Early Childhood Longitudinal Study. *Pediatrics*, 117(2), 464–473. doi:10.1542/peds.2005-0582
- Santos, P. dos, & Gigante, D. P. (2013). Relationship between food insecurity and nutritional status of Brazilian children under the age of five. *Revista Brasileira de Epidemiologia*, 16, 984–994.
- Sarlio-Lähteenkorva, S., & Lahelma, E. (2001). Food insecurity is associated with past and present economic disadvantage and body mass index. *The Journal of Nutrition*, 131(11), 2880–2884.
- \*Schlüssel, M. M., Silva, A. A. M. da, Pérez-Escamilla, R., & Kac, G. (2013). Household food insecurity and excess weight / obesity among Brazilian women and children: a life-course approach. *Cadernos de Saúde Pública*, 29(2), 219–226.
- \*Seligman, H. K., Bindman, A. B., Vittinghoff, E., Kanaya, A. M., & Kushel, M. B. (2007). Food insecurity is associated with diabetes mellitus: Results from the National Health Examination and Nutrition Examination Survey (NHANES) 1999–2002. *Journal of General Internal Medicine*, 22(7), 1018–1023. doi:10.1007/s11606-007-0192-6
- \*Seligman, H. K., Laraia, B. A., & Kushel, M. B. (2009). Food Insecurity Is Associated with Chronic Disease among Low-Income. *The Journal of Nutrition*, 140, 304–310. doi:10.3945/jn.109.112573.number
- \*Shamah-Levy, T., Mundo-Rosas, V., & Rivera-Dommarco, J. a. (2014). La magnitud de la inseguridad alimentaria en México: Su relación con el estado de nutrición y con factores socioeconómicos. *Salud Pública de Mexico*, 56(SUPPL.1), 79–85. Retrieved from [/scielo.php?script=sci\\_arttext&pid=&lang=pt](http://scielo.php?script=sci_arttext&pid=&lang=pt)

- Sharif, Z. M., & Merlin, A. (2001). Assessment of food insecurity among low income households in Kuala Lumpur using the Radimer/Cornell Food Insecurity Instrument - a validation study. *Malaysian Journal of Nutrition*, 7, 15–32. Retrieved from <http://www.ncbi.nlm.nih.gov/pubmed/22692426>
- Shariff, Z. M., & Khor, G. L. (2005). Obesity and household food insecurity: evidence from a sample of rural households in Malaysia. *European Journal of Clinical Nutrition*, 59(9), 1049–1058. doi:10.1038/sj.ejcn.1602210
- Shariff, Z. M., Sulaiman, N., Jalil, R. A., Yen, W. C., Yaw, Y. H., Taib, M. N. M., ... Lin, K. G. (2014). Food insecurity and the metabolic syndrome among women from low income communities in Malaysia. *Asia Pacific Journal of Clinical Nutrition*, 23(April 2013), 138–147. doi:10.6133/apjcn.2014.23.1.05
- Shin, J., Bautista, L. E., Walsh, M. C., Malecki, K. C., & Nieto, F. J. (2015). Food insecurity and dyslipidemia in a representative population-based sample in the US. *Preventive Medicine*, 77, 186–190. doi:10.1016/j.ypmed.2015.05.009
- Singh, A., Singh, A., & Ram, F. (2014). Household food insecurity and nutritional status of children and women in Nepal. *Food Nutr Bull*, 35(1), 3–11. Retrieved from <http://www.ncbi.nlm.nih.gov/pubmed/24791573>
- Sirotin, N., Hoover, D. R., Shi, Q., Anastos, K., & Weiser, S. D. (2014). Food insecurity with hunger is associated with obesity among HIV-infected and at risk women in Bronx, NY. *PLoS ONE*, 9(8), e105957. doi:10.1371/journal.pone.0105957
- \*Smith, C., & Richards, R. (2008). Dietary intake, overweight status, and perceptions of food insecurity among homeless Minnesotan youth. *American Journal of Human Biology*, 20(5), 550–63. doi:10.1002/ajhb.20780
- Stuff, J. E., & et al. (2006). Household food insecurity and obesity, chronic disease, and chronic disease. *Journal of Hunger and Environmental Nutrition*, 1, 43–62. doi:10.1300/J477v01n02
- \*Suglia MS, ScD, S. F., Duarte PhD, C. S., Chambers PhD, E. C., Boynton-Jarrett MD, ScD, R., Suglia, S. F., Duarte, C. S., ... Boynton-Jarrett, R. (2013). Social and Behavioral Risk Factors for Obesity in Early Childhood. *Journal of Developmental and Behavioral Pediatrics*, 34(8), 549. doi:10.1097/DBP.0b013e3182a509c0
- \*Suglia, S. F., Duarte, C. S., Chambers, E. C., & Boynton-Jarrett, R. (2012). Cumulative Social Risk and Obesity in Early Childhood. *Pediatrics*, 129(5), e1173–e1179. doi:10.1542/peds.2011-2456
- Sullivan, A. F., Clark, S., Pallin, D. J., & Camargo, C. A. (2010). Food security, health, and medication expenditures of emergency department patients. *The Journal of Emergency Medicine*, 38(4), 524–8. doi:10.1016/j.jemermed.2008.11.027
- Townsend, M. S., Peerson, J., Love, B., Achterberg, C., & Murphy, S. P. (2001). Food insecurity is positively related to overweight in women. *The Journal of Nutrition*, 131(6), 1738–1745.
- Trapp, C. M., Burke, G., Gorin, A. A., Wiley, J. F., Hernandez, D., Crowell, R. E., ... Cloutier, M. M. (2015). The Relationship between Dietary Patterns, Body Mass Index Percentile, and Household Food Security in Young Urban Children. *Childhood Obesity*, 11(2), 1–8. doi:10.1089/chi.2014.0105
- Tremblay, L., & Rinaldi, C. M. (2010). Eating Behaviors The prediction of preschool children's weight from family environment factors: Gender-linked differences. *Eating Behaviors*, 11(4), 266–275. doi:10.1016/j.eatbeh.2010.07.005
- Utter, J., Denny, S., Robinson, E., Teevale, T., Crengle, S., Ameratunga, S., & Fleming, T. (2012). Food Security Concerns Among Young People: Impact on Eating Behaviors and Weight Status. *Journal of Hunger & Environmental Nutrition*, 7(July 2015), 101–111. doi:10.1080/19320248.2012.649675
- VanEenwyk, J. (2003). Self-reported concern about food security associated with obesity - Washington, 1995-9. *Morbidity and Mortality Weekly Reports*, 52(35), 833–856.
- Velásquez-Melendez, G., & et al. (2011). Mild but Not Light or Severe Food Insecurity Is Associated with Obesity among Brazilian W. *Journal of Nutrition*, 141, 898–902. doi:10.3945/jn.110.135046.persists
- Vicenzi, K., Henn, R. L., Weber, A. P., Backes, V., Vieira Paniz, V. M., Donatti, T., & Anselmo Olinto, M. T. (2015). Food insecurity and overweight in first grade students in the municipal school system in Sao Leopoldo, Rio Grande do Sul State, Brazil. *Cadernos de Saude Publica*, 31(5), 1084–1094. doi:10.1590/0102-311X00055914
- Vozoris, N. T., & Tarasuk, V. S. (2003). Community and International Nutrition Household Food Insufficiency Is Associated with Poorer Health. *Journal of Nutrition*, 133, 120–126.
- Walker, R. E., & Kawachi, I. (2012). Use of concept mapping to explore the influence of food security on food buying practices. *Journal of the Academy of Nutrition and Dietetics*, 112(5), 711–7. doi:10.1016/j.jand.2011.12.020
- \*Ward, R. K., Jilcott, S. B., & Bethel, J. W. (2011). Acculturation, Food Insecurity, Diet Quality, and Body Mass Index Among Pre-Conception-Aged Latino Women in Eastern North Carolina. *Journal of Hunger & Environmental Nutrition*, 6(4), 490–496. doi:10.1080/19320248.2011.627300



- \*Watt, T. T., Appel, L., Roberts, K., Flores, B., & Morris, S. (2013). Sugar, stress, and the supplemental nutrition assistance program: Early childhood obesity risks among a clinic-based sample of low-income hispanics. *Journal of Community Health, 38*(3), 513–520. doi:10.1007/s10900-012-9641-1
- Webb, A. L., Schiff, A., Currivan, D., & Villamor, E. (2008). Food Stamp Program participation but not food insecurity is associated with higher adult BMI in Massachusetts residents living in low-income neighbourhoods. *Public Health Nutrition, 11*(12), 1248–55. doi:10.1017/S1368980008002309
- Weigel, M. M., & Armijos, M. M. (2015). Food Insufficiency in the Households of Reproductive-Age Ecuadorian Women: Association with Food and Nutritional Status Indicators. *Ecology of Food and Nutrition, 54*(1), 20–42. doi:10.1080/03670244.2014.953249
- Weigel, M. M., Armijos, R. X., Hall, Y. P., Ramirez, Y., & Orozco, R. (2007). The household food insecurity and health outcomes of U.S. -Mexico border migrant and seasonal farmworkers. *Journal of Immigrant and Minority Health, 9*, 157–169. doi:10.1007/s10903-006-9026-6
- Whitaker, R. C., & Orzol, S. M. (2006). Obesity among US urban preschool children. *Archives of Pediatrics & Adolescent Medicine, 160*(6), 578–584.
- Whitaker, R. C., & Sarin, A. (2007). Change in Food Security Status and Change in Weight Are Not Associated in Urban Women with Preschool Children. *Journal of Nutrition, 137*, 2134–9.
- Widome, R., Neumark-Sztainer, D., Hannan, P. J., Haines, J., & Story, M. (2009). Eating when there is not enough to eat: Eating behaviors and perceptions of food among food-insecure youths. *American Journal of Public Health, 99*(5), 822–828. doi:10.2105/AJPH.2008.139758
- Wilde, P. E., & Peterman, J. N. (2006). Individual weight change is associated with household food security status. *The Journal of Nutrition, 136*, 1395–1400.
- Winicki, J., & Jemison, K. (2003). Food insecurity and hunger in the kindergarten classroom: Its effect on learning. *Contemporary Economic Policy, 21*, 145–57.
- Wojcicki, J. M., Jimenez-Cruz, A., Bacardi-Gascon, M., Schwartz, N., & Heyman, M. B. (2012). Bimodal distribution of risk for childhood obesity in urban Baja California, Mexico. *Journal of Urban Health, 89*(4), 628–638. doi:10.1007/s11524-011-9666-2
- Yaemsiri, S., Olson, E. C., He, K., & Kerker, B. D. (2012). Food concern and its associations with obesity and diabetes among lower-income New Yorkers. *Public Health Nutrition, 15*(1), 39–47. doi:10.1017/S1368980011001674
